# Supplementary material
Source: PubMed Central journal article supplement (PMC2629308)
Supplement: 0806296105_0806296105SI.pdf [file 0806296105_0806296105SI.pdf]

# Supporting Information

## Bestman and Cline 10.1073/pnas.0806296105

### SI Methods

**Electroporation Settings.** Electroporation for transfecting cells with plasmid DNA: Patch pipette with  $\approx 1\text{-}\mu\text{m}$  tip diameter containing 1- to  $4\text{-}\mu\text{g}/\mu\text{l}$  plasmid DNA. Stimulus settings: 500-ms train, 1-ms pulse, 200 Hz at 1 to 2  $\mu\text{A}$ .

**Electroporation for Electrophysiology.** Using a pulled micropipette, the brain ventricle was filled plasmid ( $1\text{--}4\ \mu\text{g}/\mu\text{l}$ ) followed by stimulation with platinum plate electrodes (5 pulses, 1.6-ms duration, 50 V).

**Electroporation for Morpholino and Plasmid Transfection.** A small volume ( $<1\ \mu\text{l}$ ) of plasmid encoding eGFP driven by UAS-Gal4 ( $1\text{--}4\ \mu\text{g}/\mu\text{l}$ ) (1) and 500- $\mu\text{M}$  morpholino solution was injected into the ventricle or into the points tectum itself, followed by stimulation with platinum-plate electrodes (three pulses, 1.6-ms duration, 35 V).

**Morpholino Oligonucleotide Sequences.** CONTROL-MO (a five-base mismatch): GCGAAATTCAATTTGAATCCAATGG; CPEB-MO: GCCAAATTGAATTTCAATGCAATCG.

**Saline Composition.** Extracellular saline for AMPA mEPSC recordings contains (in mM): 115 NaCl, 4 KCl, 3 CaCl<sub>2</sub>, 3 Mg Cl<sub>2</sub>, 5 Hepes, 10 glucose, 0.01 glycine with 0.1 picrotoxin, and 0.001 TTX.

Internal solution for AMPA mEPSC recordings contains (in mM): 80 Cesium methanesulfonate, 5 Mg Cl<sub>2</sub>, 20 tetraethylammonium, 10 EGTA, 20 Hepes, 2 ATP, and 0.3 GTP, (pH 7.2 with CsOH and osmolarity, 255 mOsm).

Internal saline for *in vivo* recordings contains (in mM): 110 K-gluconate, 8 KCl, 5 NaCl, 1.5 MgCl, 20 Hepes, 0.5 EGTA, 4 ATP, and 0.3 GTP, pH 7.2 with KOH (osmolarity, 255 mOsm).

**Visual Stimulation Protocol.** The visual stimulus protocol (controlled by a Master 8 stimulator, A.M.P.I.) consisted of: a light adaptation period, 100-s long train of 2.5-ms pulses at 200 Hz (because this fast flicker is not perceptible, the effective intensity equals 50% of the stimulus intensity); the light stimulus, 100 s of 2.5-s pulse repeated at 0.2 Hz; and 70 s of darkness. During the final 70-s dark period, the cell access and patch quality were assessed so that the visual stimulus protocol could be immediately repeated.

**Immunohistochemistry, Microscopy, and Analysis.** Two days after electroporation, tadpoles were anesthetized, the skin and membranes around the brain were dissected away, and tadpoles were placed in cold, freshly made 4% paraformaldehyde (Sigma; made in 0.1 M phosphate buffer). The penetration of the fixative was aided by a brief (10–15 s) exposure to 750 W microwave.

After fixing for an additional 2 h at room temperature, tadpoles were rinsed in 0.1 phosphate buffer and placed in 30% sucrose where they were stored at 4 °C until cryosectioning (25- $\mu\text{m}$  coronal sections placed on glass slides). All sections were processed in parallel with identical reagents. A standard immunohistochemical protocol was used where the tissue was rinsed in 0.3% Triton X-100 in 0.1 M phosphate buffer and blocked with 5% normal goat serum. The tPA antibody (mouse monoclonal, 2A153; AbCam) was diluted 1:100 in 0.03% Triton X-100 and the sections were incubated 24 h at 4 °C. The sections were rinsed and incubated for 1 h at room temperature in the secondary antibody, Alexa Fluor 633 goat anti-mouse IgG (Molecular Probes), diluted 1:400. After the final rinses in 0.1 M phosphate buffer, the sections were mounted in VectaShield mounting medium with propidium iodide (Vector Laboratories) and stored at  $-20\ ^\circ\text{C}$  until imaged.

Sections were imaged with an Olympus FV300 confocal using a 60 $\times$  water immersion objective (1.1 NA, Olympus) equipped with Ar-Ion 488, He-Ne 543 and 633 laser lines. A 510–530 bandpass, 585, and 660 long-pass filters were used. Image stacks of 1- $\mu\text{m}$  z intervals were taken sequentially.

All analyses were conducted using Metamorph (MDS Analytical Technologies) blind to genotype of the transfected cell. After locating a transfected cell, the optical section with the highest propidium iodide fluorescence was found and, using that signal, a region of interest was drawn around the soma and then transferred to the tPA immunofluorescence channel where the average fluorescence intensity per pixel was determined. An untransfected neighboring cell to the transfected cell was selected at random and the procedure repeated. The normalized fluorescence (FI)-intensity (Int) difference was determined according to the formula: [Average FI Int (transfected cell)–Average FI Int (untransfected neighbor)]/Average FI Int (transfected cell).

**Western Blot.** Twenty-five brains of tadpoles electroporated with full-length CPEB or delCPEB were dissected, immediately frozen on dry ice, then homogenized in radioimmunoprecipitation assay buffer, separated by SDS/PAGE, and the proteins were transferred to nitrocellulose. The blots were blocked overnight (5% milk and 0.1% TBS with Tween) and then incubated in blocking solution with CPEB1 antibody (2  $\mu\text{g}/\text{ml}$ ; AbCam) overnight at 4 °C and then room temperature for 2 h. The blots were then rinsed and then incubated in goat anti-rabbit HRP (1:3000) for 1 h. Detection was by chemiluminescence (Amersham). To check for equal lane loading, blots were then stripped and the procedure repeated with an antibody to beta-actin (0.5  $\mu\text{g}/\text{ml}$ , AbCam). The ratio of the intensity of the CPEB band to the actin bands were measured in each lane and these values were compared between the CPEB and delCPEB lanes.

1. Koster RW, Fraser SE (2001) Tracing transgene expression in living zebrafish embryos. *Dev Biol* 233:329–346.
2. Huang YS, Carson JH, Barbarese E, Richter JD (2003) Facilitation of dendritic mRNA transport by CPEB. *Genes Dev* 17:638–653.

3. Mendez R, Richter JD (2001) Translational control by CPEB: a means to the end. *Nat Rev Mol Cell Biol* 2:521–529.

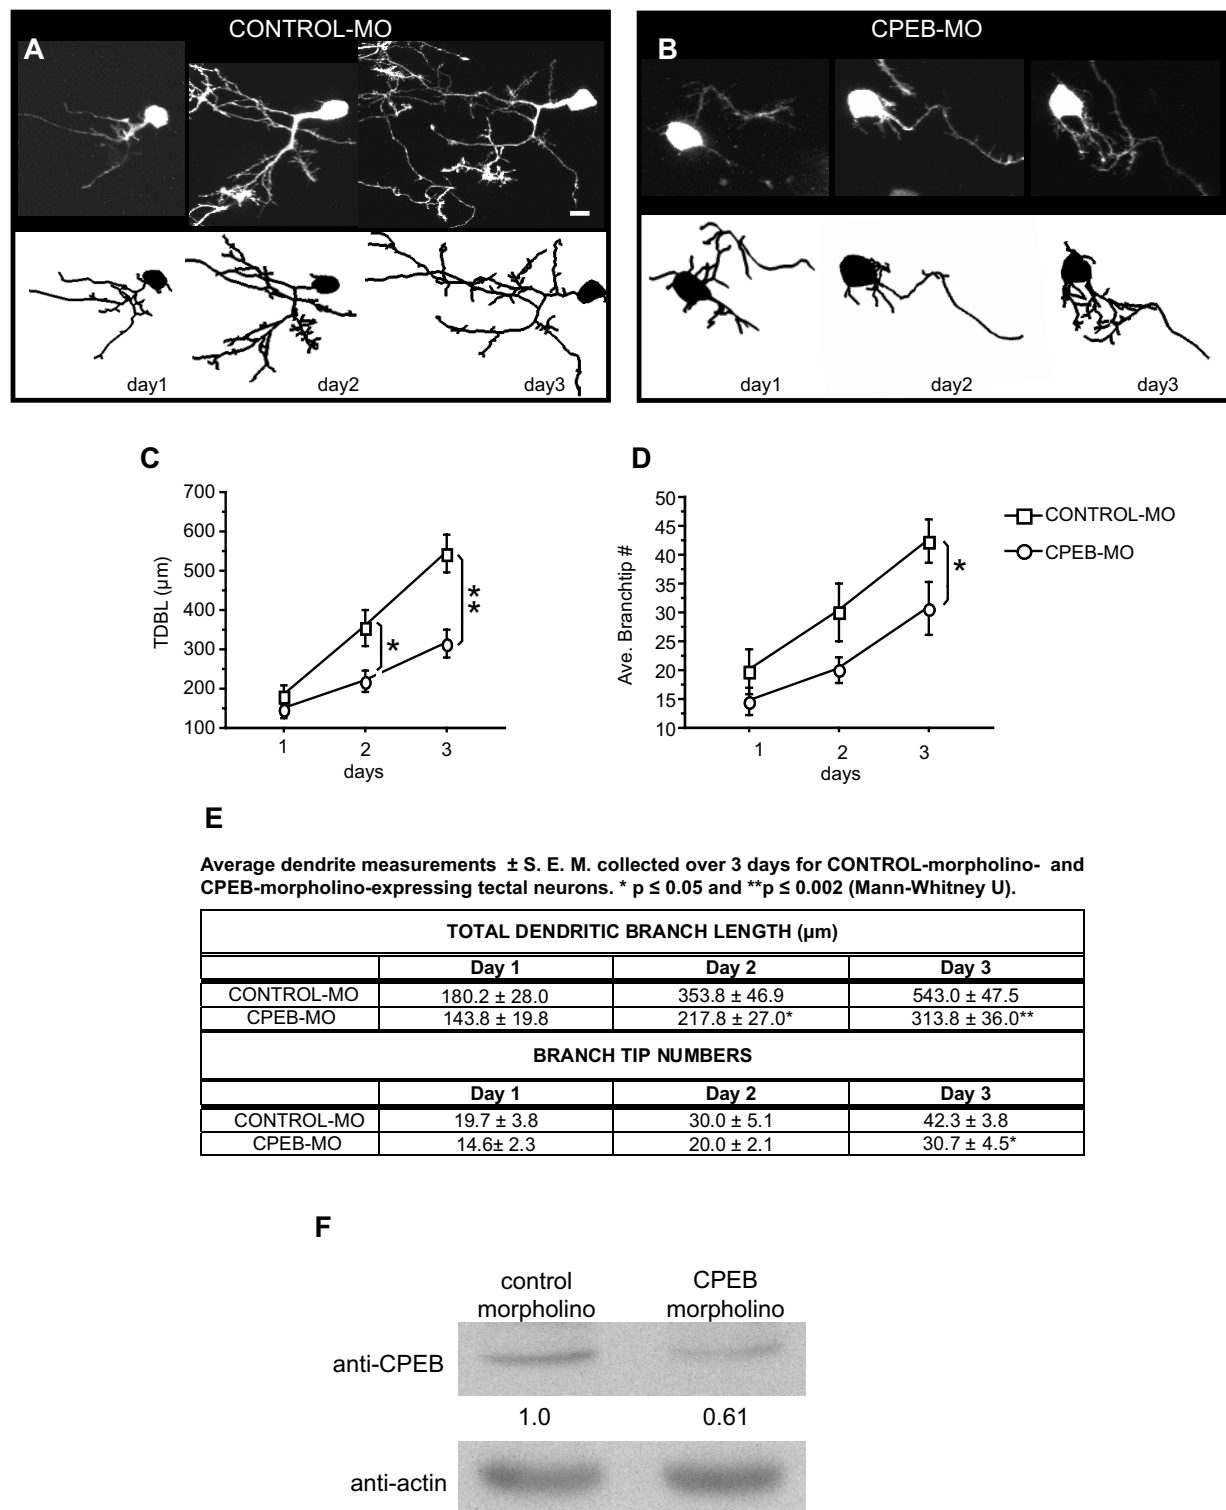

**Fig. 51.** Neurons expressing morpholino antisense oligonucleotides directed against CPEB fail to show experience-dependent structural plasticity. (A and B) Examples of tectal neurons expressing CPEB morpholinos (CPEB-MO) (A) and control 5-base mismatch morpholinos (CONTROL-MO) (B). Time-lapse *in vivo* two-photon images of morpholino-expressing neurons collected daily over 3 days. (C and D) Quantification of dendritic morphology of CPEB-MO-expressing neurons imaged daily over 3 days in comparison to CONTROL-MO cells. The dendritic growth of the two groups of neurons was significantly different over 3 days in total dendritic-branch length (TDBL) (C) or branch-tip number (D). (E) A table of the values (mean and SEMs) presented in (C) and (D). CONTROL-MO,  $n = 13$ ; CPEB-MO,  $n = 12$ . (F) Western Blot. A CPEB antibody was used to probe the levels of CPEB protein in lysate made from CONTROL-MO and CPEB-MO electroporated brains. CPEB-MO reduces CPEB protein levels compared to CONTROL-MO.

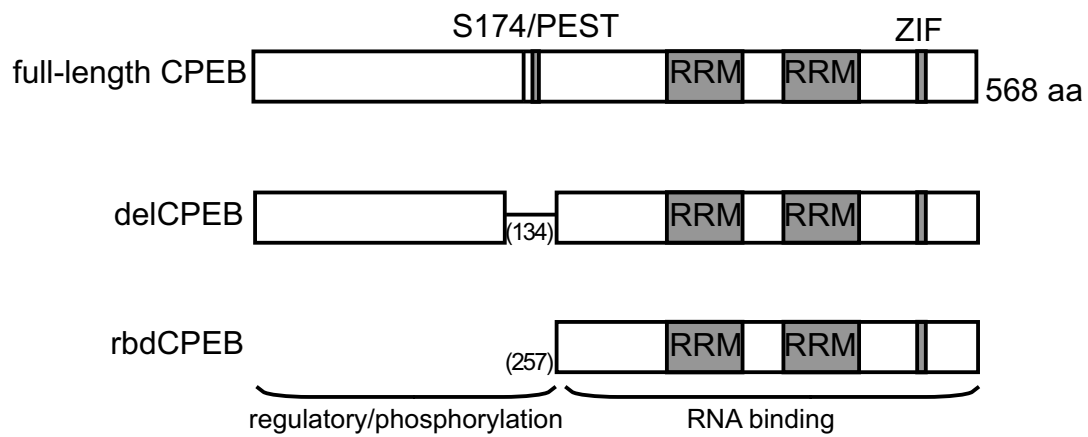

**Fig. S2.** Diagram of CPEB constructs. delCPEB, a CPEB deletion mutant ( $\Delta 124-258$ ) removing the S174 that is phosphorylated to activate the protein and the PEST degradation motif; PEST, PEST degradation motif; rbdCPEB, a CPEB deletion mutant ( $\Delta 1-258$ ) where the C-terminal portion of the protein containing the RNA binding domains is left intact; RRM, RNA recognition motif domain; ZIF, zinc finger RNA binding domain. (Modified from refs. 2 and 3.)



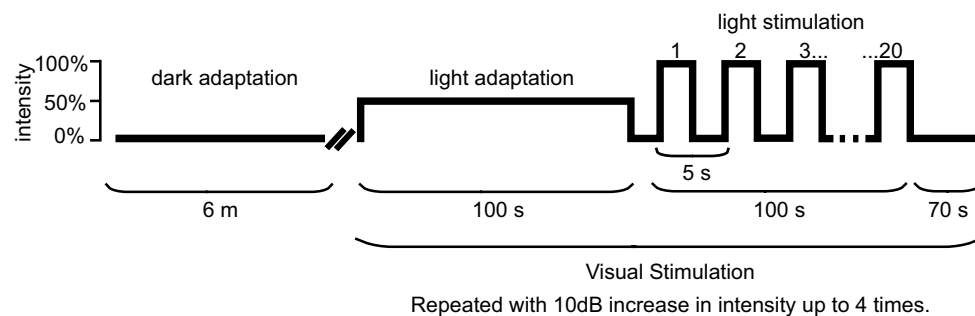

**Fig. S4.** Schematic of stimulation protocol. Intact, anesthetized tadpoles were dark-adapted for 6 min before the visual stimulation protocol was initiated. For each cell, the protocol was repeated up to four times, each repetition with a 10-dB (in some instances, 20 dB) increase in full field intensity. The visual stimulus protocol consisted of: 100 s light-adaptation period (the effective intensity equal to 50% of the stimulus intensity) followed by the light stimulus in which 20 repeated, full-field light flashes were presented to the animal and ending with 70 s of darkness.

**Table S1. Three dimensional analysis of dendritic arbor over 3 days**

|                                                 | Day 1            | Day 2             | Day 3              |
|-------------------------------------------------|------------------|-------------------|--------------------|
| Total dendritic branch length ( $\mu\text{m}$ ) |                  |                   |                    |
| ControlMO                                       | 180.2 $\pm$ 28.0 | 353.8 $\pm$ 46.9  | 543.0 $\pm$ 47.5   |
| CPEBMO                                          | 143.8 $\pm$ 19.8 | 217.8 $\pm$ 27.0* | 313.8 $\pm$ 36.0** |
| Branch-tip numbers                              |                  |                   |                    |
| ControlMO                                       | 19.7 $\pm$ 3.8   | 30.0 $\pm$ 5.1    | 42.3 $\pm$ 3.8     |
| CPEBMO                                          | 14.6 $\pm$ 2.3   | 20.0 $\pm$ 2.1    | 30.7 $\pm$ 4.5*    |

Average dendrite measurements  $\pm$  SEM collected over 3 days for neurons expressing control and CPEB morpholinos (MO). \* $P \leq 0.05$  and \*\* $P \leq 0.005$  (Mann-Whitney U).

**Table S2. Three dimensional analysis of dendritic arbor over 3 days**

|                                                                 | Day 1            | Day 2             | Day 3              |
|-----------------------------------------------------------------|------------------|-------------------|--------------------|
| <b>Total dendritic branch length (<math>\mu\text{m}</math>)</b> |                  |                   |                    |
| Control                                                         | 293.0 $\pm$ 45.0 | 620.8 $\pm$ 62.6  | 843.2 $\pm$ 62.4   |
| CPEB                                                            | 336.4 $\pm$ 69.0 | 505.5 $\pm$ 68.4  | 632.7 $\pm$ 69.3   |
| delCPEB                                                         | 241.6 $\pm$ 40.4 | 376.8 $\pm$ 59.8* | 455.7 $\pm$ 78.9** |
| rbdCPEB                                                         | 409.0 $\pm$ 55.1 | 581.9 $\pm$ 47.2  | 781.0 $\pm$ 85.8   |
| <b>Branch-tip numbers</b>                                       |                  |                   |                    |
| Control                                                         | 20.0 $\pm$ 3.8   | 46.1 $\pm$ 6.1    | 60.1 $\pm$ 7.0     |
| CPEB                                                            | 20.9 $\pm$ 5.2   | 38.8 $\pm$ 6.9    | 43.4 $\pm$ 6.2     |
| delCPEB                                                         | 14.2 $\pm$ 2.5   | 27.4 $\pm$ 4.7    | 35.4 $\pm$ 7.9*    |
| rbdCPEB                                                         | 22.5 $\pm$ 3.2   | 36.0 $\pm$ 5.3    | 45.7 $\pm$ 5.9     |

Average dendrite measurements  $\pm$  SEM, collected over 3 days for control-, CPEB-, delCPEB, and rbdCPEB-expressing tectal neurons. Significant difference from the control group: \* $P \leq 0.05$  and \*\* $P \leq 0.005$  (Mann-Whitney U).

**Table S3. Dendritic arbor growth with and without visual stimulation**

|                                                                 | 0 h              | 4 h              | 8 h                |
|-----------------------------------------------------------------|------------------|------------------|--------------------|
| <b>Total dendritic branch length (<math>\mu\text{m}</math>)</b> |                  |                  |                    |
| Control                                                         | 478.1 $\pm$ 81.4 | 506.4 $\pm$ 80.0 | 619.4 $\pm$ 89.9** |
| CPEB                                                            | 433.8 $\pm$ 48.7 | 412.9 $\pm$ 31.1 | 488.0 $\pm$ 28.6** |
| delCPEB                                                         | 389.8 $\pm$ 35.0 | 397.2 $\pm$ 31.8 | 403.3 $\pm$ 33.7   |
| rbdCPEB                                                         | 509.9 $\pm$ 42.0 | 538.6 $\pm$ 44.9 | 586.4 $\pm$ 53.8   |
| <b>Branch-tip numbers</b>                                       |                  |                  |                    |
| Control                                                         | 38.5 $\pm$ 7.5   | 39.9 $\pm$ 7.4   | 50.1 $\pm$ 8.8*    |
| CPEB                                                            | 33.0 $\pm$ 4.2   | 30.4 $\pm$ 4.0   | 42.9 $\pm$ 4.0**   |
| delCPEB                                                         | 35.5 $\pm$ 4.6   | 34.9 $\pm$ 4.6   | 35.4 $\pm$ 4.6     |
| rbdCPEB                                                         | 38.5 $\pm$ 3.6   | 43.5 $\pm$ 3.9*  | 43.7 $\pm$ 5.3     |

Average dendrite measurements before visual deprivation (0 h), and before (4 h) and after (8 h) the visual stimulation. Significant changes in a 4 h period: \* $P \leq 0.05$ , \*\* $P \leq 0.005$  (Mann-Whitney U).



**Table S4. Average growth rates of dendritic arbors during 4 h with and without visual stimulation**

|         | TDBL ( $\mu\text{m}$ ) |                   | Branch tips    |                   |
|---------|------------------------|-------------------|----------------|-------------------|
|         | Dark                   | Light stimulation | Dark           | Light stimulation |
| Control | 28.3 $\pm$ 14.5        | 113.0 $\pm$ 21.7* | 1.4 $\pm$ 3.7  | 10.2 $\pm$ 3.8    |
| CPEB    | -20.9 $\pm$ 24.4       | 75.2 $\pm$ 14.5** | -2.6 $\pm$ 2.8 | 12.5 $\pm$ 1.4**  |
| delCPEB | 7.5 $\pm$ 13.7         | 6.1 $\pm$ 10.7    | -0.6 $\pm$ 2.0 | 0.6 $\pm$ 1.7     |
| rbdCPEB | 28.8 $\pm$ 19.7        | 47.4 $\pm$ 24.8   | 5.1 $\pm$ 6.2  | 0.2 $\pm$ 2.9     |

Changes in TDBL and branch-tip numbers over 4 hours. Significant difference from control group in the growth rates measured during the visual deprivation period and visual stimulation period: \* $P \leq 0.01$ , \*\* $P \leq 0.005$  (Mann-Whitney U).

**Table S5. Branching behavior and growth of individual branches during the 4-h periods with and without visual stimulation**

|         | Dark                         | Light stimulation | Dark                          | Light stimulation |
|---------|------------------------------|-------------------|-------------------------------|-------------------|
|         | % New branches               |                   | % Lost branches               |                   |
| Control | 57.5 ± 5.3                   | 62.9 ± 4.1        | 51.4 ± 6.1                    | 55.0 ± 5.0        |
| CPEB    | 49.1 ± 6.2                   | 59.3 ± 3.3        | 54.4 ± 5.7                    | 39.6 ± 5.1        |
| delCPEB | 46.1 ± 4.1                   | 45.0 ± 3.4**      | 47.6 ± 2.3                    | 48.0 ± 2.6        |
|         | branch length extension (μm) |                   | Branch length retraction (μm) |                   |
| Control | 5.4 ± 0.3                    | 6.2 ± 0.3         | 4.9 ± 0.2                     | 4.8 ± 0.3         |
| CPEB    | 5.0 ± 0.3                    | 4.6 ± 0.2**       | 4.9 ± 0.3                     | 4.9 ± 0.3         |
| delCPEB | 4.4 ± 0.2**                  | 4.0 ± 0.2**       | 4.1 ± 0.2*                    | 3.8 ± 0.1**       |

Significant difference from control group: \* $P \leq 0.05$ , \*\* $P \leq 0.01$  (Mann-Whitney U).

**Table S6. Average responses of tectal neurons to full field visual stimuli**

Total charge transfer (pA/s)

| Stimulus Intensity | 0.01        | 0.1         | 1            | 10           |
|--------------------|-------------|-------------|--------------|--------------|
| Control            | 42.6 ± 13.1 | 75.0 ± 24.4 | 86.3 ± 20.7  | 106.3 ± 35.2 |
| CPEB               | 24.6 ± 6.5  | 46.1 ± 10.8 | 32.6 ± 15.2* | 30.0 ± 8.3** |
| delCPEB            | 8.1 ± 2.3*  | 9.7 ± 3.4** | 6.9 ± 2.7*** | 4.6 ± 2.9*** |

Average charge transfer (Q) over the initial 500 ms of the light-off response of tectal neurons. Stimuli of increasing 10-dB intensities ( $10^{-3}$  to  $10^{+1}$ ) were presented to the intact animal. Significant difference from the control group: \* $P \leq 0.05$ , \*\* $P \leq 0.01$ , \*\*\* $P \leq 0.005$  (Mann-Whitney U).
